# Supplementary material
Source: PubMed Central journal article supplement (PMC554027)

Figure A: Risk factors for pre-eclampsia. Multiple v singleton pregnancies

Figure B: Risk factors for pre-eclampsia. Case-control: nulliparity v parity in pre-eclampsia/eclampsia

**Figure C: Risk factors for pre-eclampsia. Cohort: nulliparity v multiparity**

**Figure D: Risk factors for pre-eclampsia. Pre-existing diabetes v no diabetes**

**Figure E: Risk factors for pre-eclampsia. Case-control: previous pre-eclampsia v none**

**Figure F: Risk factors for pre-eclampsia. Cohort: per-eclampsia in second pregnancy v none**

Figure G: Risk factors for pre-eclampsia. Raised v normal BMI at booking

**Figure H: Risk factors for pre-eclampsia. Raised v normal BMI before pregnancy**

Fig A [Posted as supplied by author] Risk factors for pre-eclampsia. Multiple v singleton pregnancies

Review: Risk factors for preeclampsia  
Comparison: 11 Multiple pregnancies vs singletons  
Outcome: 01 Pre-eclampsia

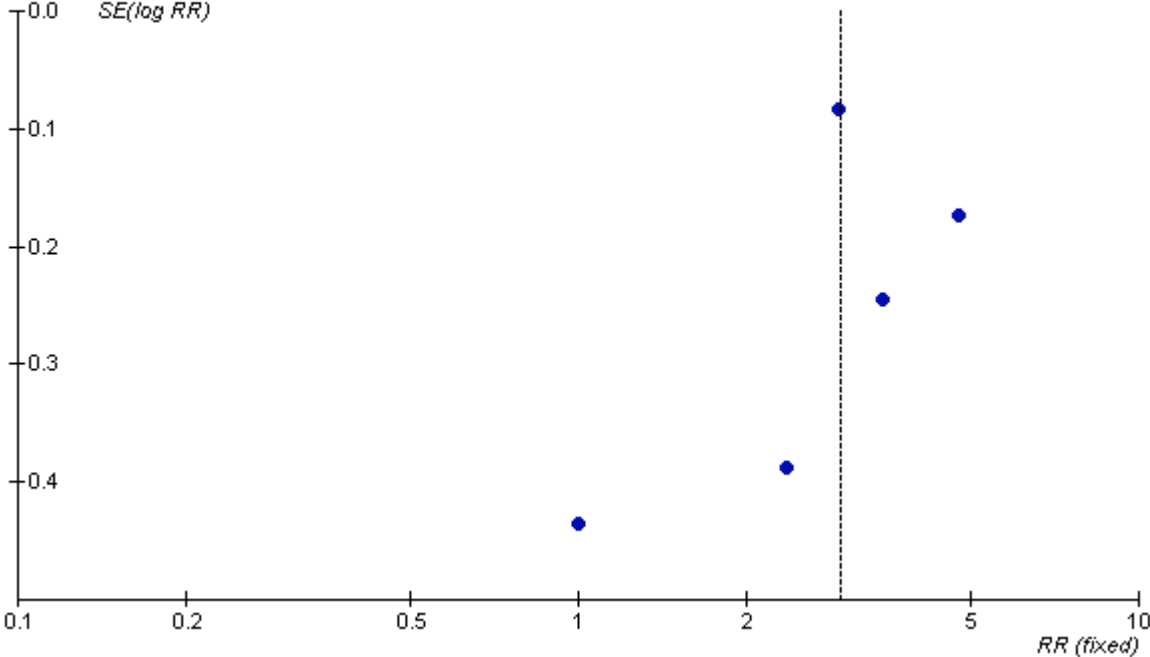

Fig B [Posted as supplied by author] Risk factors for pre-eclampsia. Case-control: nulliparity v parity in pre-eclampsia/eclampsia

Review: Risk factors for preeclampsia  
Comparison: 08 Case control: nulliparity in pre-eclampsia/eclampsia vs parity in pre-eclampsia/eclampsia  
Outcome: 01 Pre-eclampsia

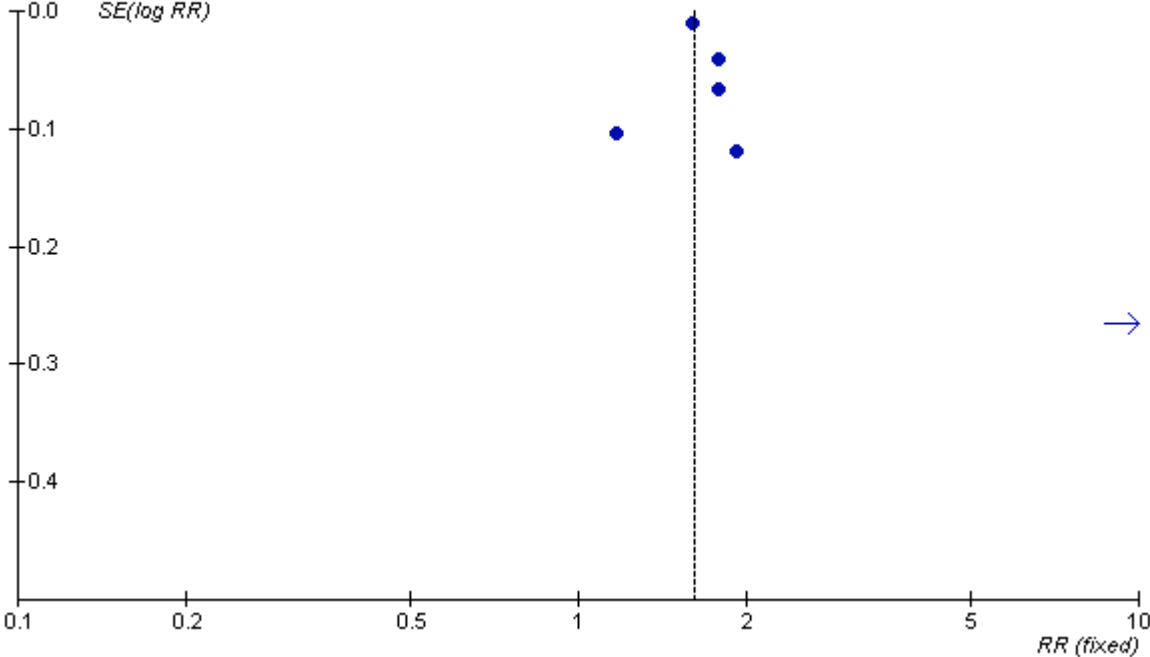

Fig C [Posted as supplied by author] Risk factors for pre-eclampsia. Cohort: nulliparity v multiparity

Review: Risk factors for preeclampsia  
Comparison: 06 Cohort: Nulliparity vs multiparity  
Outcome: 01 Pre-eclampsia

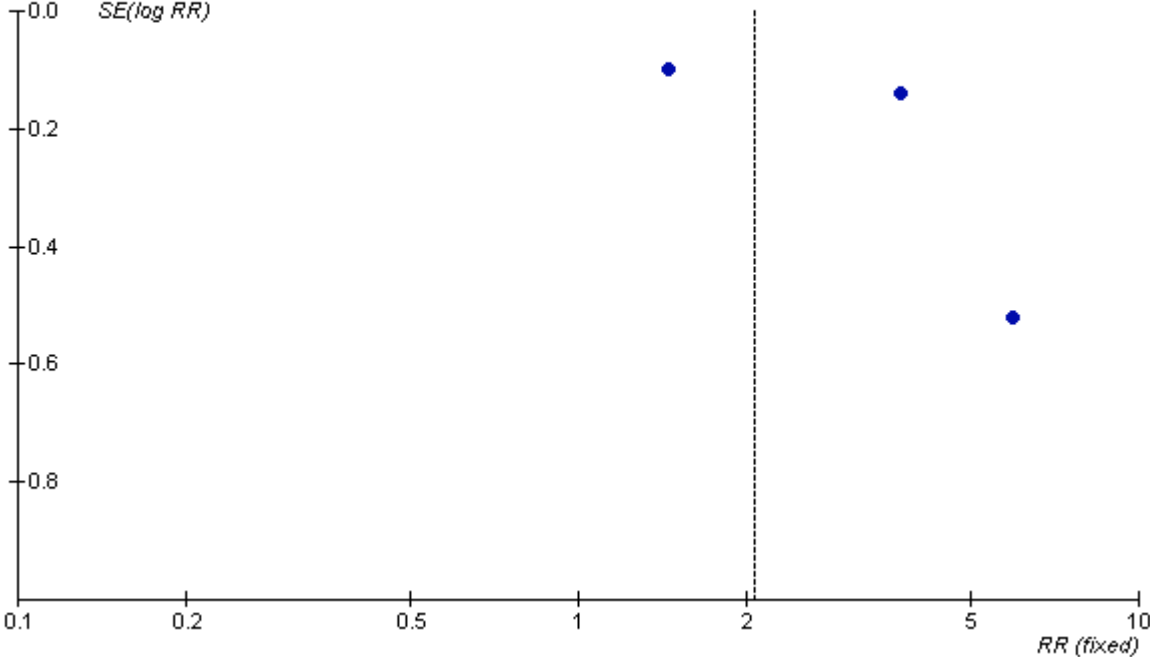

Fig D [Posted as supplied by author] Risk factors for pre-eclampsia. Pre-existing diabetes v no diabetes

Review: Risk factors for preeclampsia  
Comparison: 14 Pre-existing diabetics vs non diabetics  
Outcome: 01 Pre-eclampsia

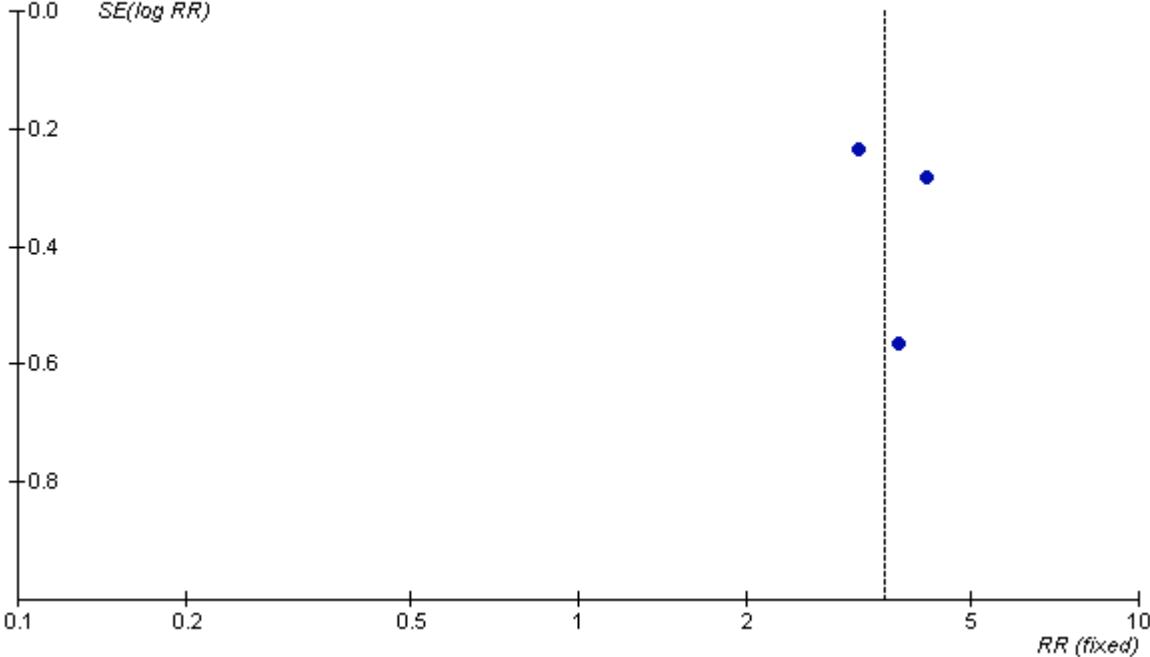

Fig E [Posted as supplied by author] Risk factors for pre-eclampsia. Case-control: previous pre-eclampsia v none

Review: Risk factors for preeclampsia  
Comparison: 09 Case control: Previous Pre-eclampsia vs none  
Outcome: 01 Previous pre-eclampsia

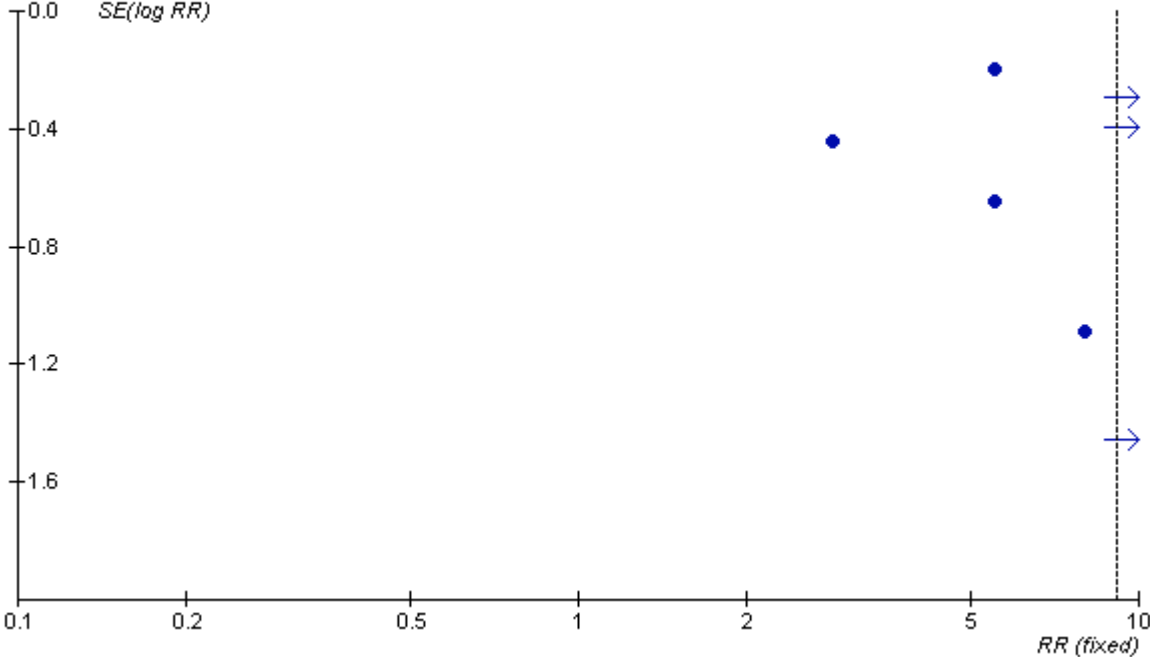

Fig F [Posted as supplied by author] Risk factors for pre-eclampsia. Cohort: per-eclampsia in second pregnancy v none

Review: Risk factors for preeclampsia  
Comparison: 10 Cohort: Pre-eclampsia in second pregnancy vs none  
Outcome: 01 Previous pre-eclampsia

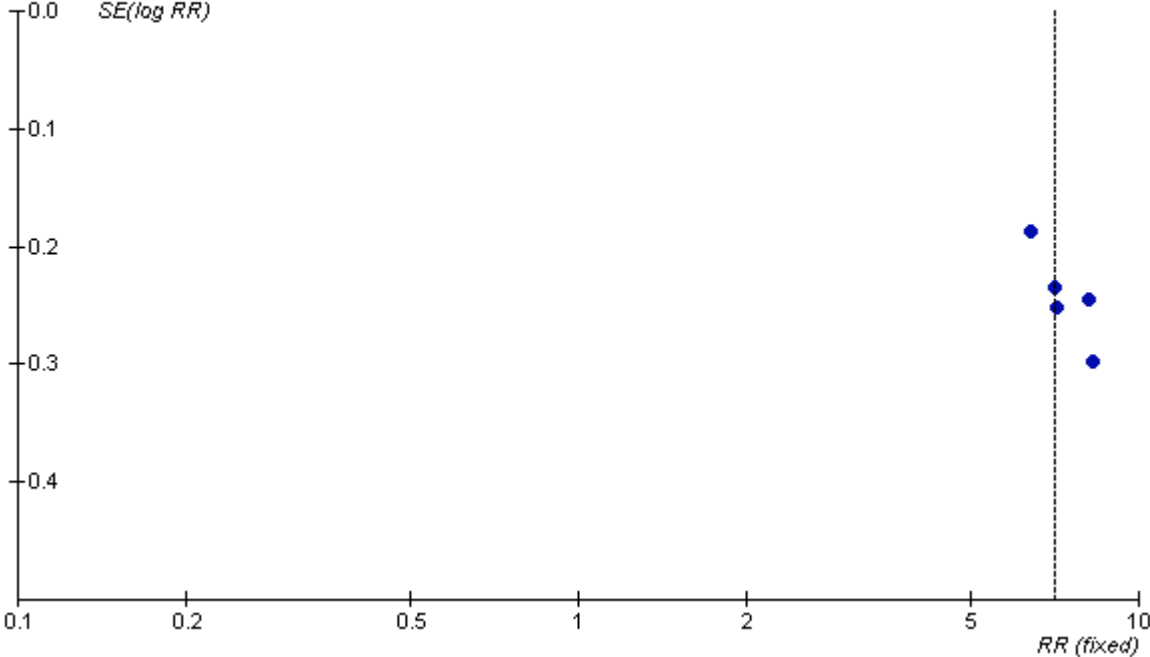

Fig G [Posted as supplied by author] Risk factors for pre-eclampsia. Raised v normal BMI at booking

Review: Risk factors for preeclampsia  
Comparison: 26 Raised BMI at booking vs normal BMI at booking  
Outcome: 01 Pre eclampsia

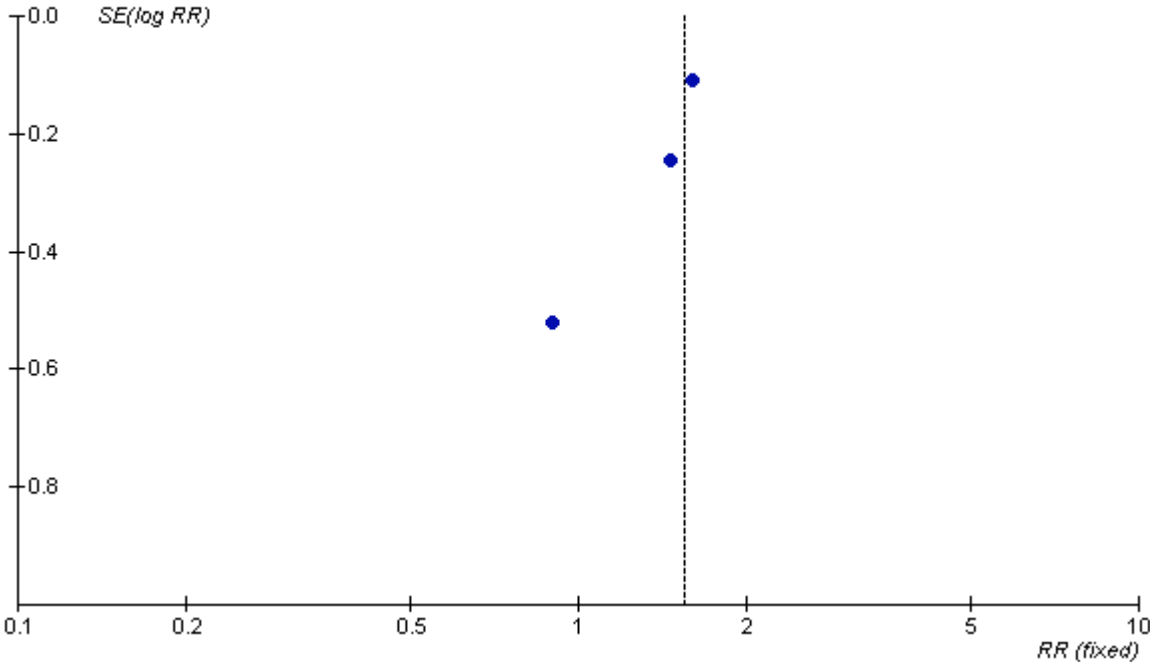



Fig H [Posted as supplied by author] Risk factors for pre-eclampsia. Raised v normal BMI before pregnancy

Review: Risk factors for preeclampsia  
Comparison: 25 Raised pre-pregnancy BMI vs normal pre-pregnancy BMI  
Outcome: 01 Pre eclampsia

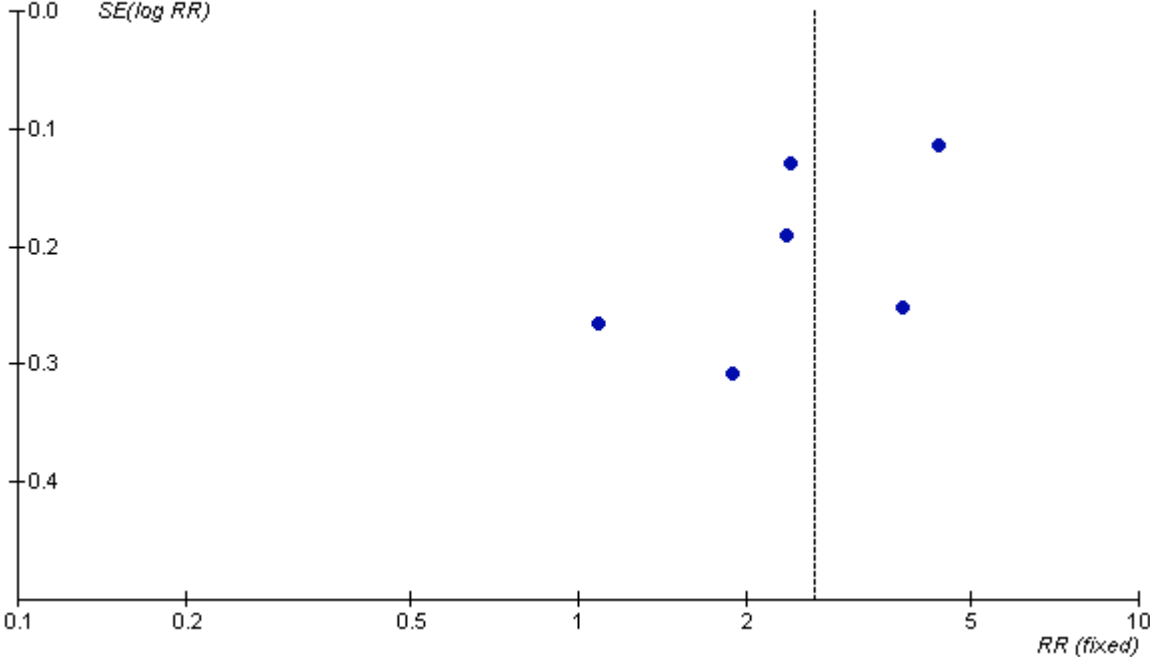

Supplement: bmj_38380.674340.E0_1.pdf [file bmj_38380.674340.E0_1.pdf]
